# Supplementary material
Source: PubMed Central journal article supplement (PMC4775145)
Supplement: supp_pp.15.01885_PP2015-01885R1_Supplemental_Tables_1_to_6.pdf [file supp_pp.15.01885_PP2015-01885R1_Supplemental_Tables_1_to_6.pdf]

**Supplemental Table S1.** Anatomical characteristics on four maize root types. Transverse sections collected at 3mm from the root tip of the primary root 7 days after germination (DAG), seminal root 9 DAG, crown root 15 DAG, brace root 60 DAG. Different letters indicated significant differences among means ( $p \leq 0.05$  by one-way ANOVA analysis). Error bars indicate means  $\pm$  SE; n = 4 roots from four individual maize plants.

|                                          | <b>Primary root</b> | <b>Seminal root</b> | <b>Crown root</b> | <b>Brace root</b> |
|------------------------------------------|---------------------|---------------------|-------------------|-------------------|
| Total transversal area, mm <sup>2</sup>  | 0.39±0.04b          | 0.29±0.03c          | 0.41±0.08b        | 2.49±0.13a        |
| Stele transversal area, mm <sup>2</sup>  | 0.06±0.008b         | 0.042±0.005c        | 0.07±0.006b       | 0.6±0.12a         |
| Meta-xylem area total, mm <sup>2</sup>   | 0.014±0.002b        | 0.0083±0.0011c      | 0.014±0.002b      | 0.058±0.011a      |
| Meta-xylem area average, mm <sup>2</sup> | 0.0028±0.0006ab     | 0.0017±0.0002b      | 0.0024±0.0002ab   | 0.0034±0.0009a    |
| Number of cortical cell layers           | 7.2±0.8b            | 6.5±1.2b            | 7±1.4b            | 16.8±2.5a         |
| Number of meta-xylem elements            | 5.4±0.5bc           | 4.3±0.3c            | 6.2±1.1b          | 17.5±3.6a         |
| Phloem pole pericycle length, $\mu$ m    | 14.5±0.5b           | 15±0.2b             | 16.1±0.6ab        | 17.1±0.3a         |
| Phloem pole pericycle width, $\mu$ m     | 11.2±0.4b           | 11.2±0.2b           | 12.3±0.7ab        | 14.2±0.5a         |
| Xylem pole pericycle length, $\mu$ m     | 10.4±0.2b           | 10.1±0.6b           | 11.4±0.4ab        | 13±0.5a           |
| Xylem pole pericycle width, $\mu$ m      | 6.4±0.3b            | 6.1±0.5b            | 8.6±0.6ab         | 10.7±0.6a         |

**Supplemental Table S2.** Overview of LCM-RNAseq outputs, mapping results and alignments to the B73 reference genome. The total reads of each sequenced sample have been mapped to the filtered gene set (FGS) of maize. Only uniquely mapping reads have been further considered. PR, primary root; SR, seminal root; CR, crown root; BR, brace root. Homo LN, homogeneous low nitrate; Local HN, local high nitrate.

| Sample        | Total no. reads | Reads no. after trimming | Reads no. mapped on genome <sup>a</sup> | Reads no. mapped without stacks <sup>b</sup> | Reads no. mapped on FGS <sup>c</sup> |
|---------------|-----------------|--------------------------|-----------------------------------------|----------------------------------------------|--------------------------------------|
| PR-Homo LN-1  | 22,393,992      | 22,390,694               | 15,042,416                              | 13,102,793                                   | 11,551,091                           |
| PR-Homo LN-2  | 22,163,124      | 22,159,902               | 14,944,871                              | 13,493,180                                   | 11,342,952                           |
| PR-Homo LN-3  | 20,593,382      | 20,590,222               | 13,941,443                              | 12,172,277                                   | 10,588,645                           |
| PR-Local HN-1 | 19,598,452      | 19,595,478               | 13,237,168                              | 11,641,917                                   | 10,122,269                           |
| PR-Local HN-2 | 21,882,574      | 21,879,247               | 14,993,060                              | 13,419,619                                   | 12,072,672                           |
| PR-Local HN-3 | 21,798,320      | 21,795,040               | 14,828,031                              | 13,213,931                                   | 11,830,761                           |
| SR-Homo LN-1  | 22,258,402      | 22,254,801               | 15,188,592                              | 13,426,855                                   | 11,777,341                           |
| SR-Homo LN-2  | 20,920,568      | 20,919,535               | 14,280,656                              | 12,754,274                                   | 11,494,099                           |
| SR-Homo LN-3  | 23,430,820      | 23,427,390               | 16,016,689                              | 14,136,501                                   | 12,478,875                           |
| SR-Local HN-1 | 22,186,730      | 22,183,345               | 14,893,348                              | 13,070,550                                   | 11,488,660                           |
| SR-Local HN-2 | 21,013,588      | 21,010,237               | 14,219,966                              | 12,509,130                                   | 10,889,938                           |
| SR-Local HN-3 | 24,297,876      | 24,294,213               | 16,494,921                              | 14,451,629                                   | 12,777,933                           |
| CR-Homo LN-1  | 20,982,794      | 20,979,713               | 14,080,795                              | 12,266,831                                   | 10,773,231                           |
| CR-Homo LN-2  | 22,042,874      | 22,039,704               | 14,938,136                              | 13,051,240                                   | 11,643,063                           |
| CR-Homo LN-3  | 22,221,340      | 22,218,945               | 14,954,404                              | 12,991,758                                   | 11,528,158                           |
| CR-Local HN-1 | 20,455,568      | 20,453,287               | 13,669,473                              | 12,099,367                                   | 10,015,618                           |
| CR-Local HN-2 | 26,737,304      | 26,734,390               | 18,158,937                              | 15,671,775                                   | 13,549,279                           |
| CR-Local HN-3 | 26,759,680      | 26,756,862               | 18,134,901                              | 15,748,463                                   | 13,855,881                           |
| BR-Homo LN-1  | 26,371,332      | 26,368,335               | 18,012,853                              | 15,890,342                                   | 13,787,719                           |
| BR-Homo LN-2  | 22,741,034      | 22,737,431               | 15,469,224                              | 13,761,059                                   | 11,408,106                           |
| BR-Homo LN-3  | 26,777,180      | 26,772,998               | 18,557,532                              | 16,180,354                                   | 13,660,643                           |

| <b>Sample</b> | <b>Total no. reads</b> | <b>Reads no. after trimming</b> | <b>Reads no. mapped on genome<sup>a</sup></b> | <b>Reads no. mapped without stacks<sup>b</sup></b> | <b>Reads no. mapped on FGS<sup>c</sup></b> |
|---------------|------------------------|---------------------------------|-----------------------------------------------|----------------------------------------------------|--------------------------------------------|
| BR-Local HN-1 | 23,385,006             | 23,381,515                      | 15,593,786                                    | 13,966,392                                         | 11,969,219                                 |
| BR-Local HN-2 | 25,201,686             | 23,179,892                      | 16,816,139                                    | 14,980,484                                         | 12,445,158                                 |
| BR-Local HN-3 | 26,945,550             | 26,941,335                      | 18,059,936                                    | 16,181,048                                         | 13,617,452                                 |

<sup>a</sup> Mapped to the reference genome of B73 (Schnable et al., 2009);

<sup>b</sup> After removal of stacked reads i.e. redundant reads sharing the same start and end coordinate, sequencing direction, and sequence;

<sup>c</sup> Mapped to the 39,656 gene models of the filtered gene set (FGS) of maize (Release 5b.60).

**Supplemental Table S3.** “Classical” maize genes detected among nitrate responsive genes identified in phloem pole pericycle cells of maize brace roots. The classical genes related to DNA synthesis and cell cycle were highlighted.

| Gene ID          | Symbol        | Gene Name                                 | Log <sub>2</sub> FC |
|------------------|---------------|-------------------------------------------|---------------------|
| AC195340.3_FG001 | <i>tua1</i>   | <i>alpha tubulin1</i>                     | 1.14                |
| AC209208.3_FG002 | <i>pip1b</i>  | <i>plasma membrane intrinsic protein1</i> | -2.13               |
| AC235534.1_FG007 | <i>ocl2</i>   | <i>outer cell layer2</i>                  | 7.77                |
| GRMZM2G003514    | <i>zag5</i>   | <i>zea agamous5</i>                       | 7.18                |
| GRMZM2G014833    | <i>pk4</i>    | <i>protein kinase4</i>                    | 2.09                |
| GRMZM2G014914    | <i>pip2e</i>  | <i>plasma membrane intrinsic protein2</i> | -2.17               |
| GRMZM2G016890    | <i>glu1</i>   | <i>beta glucosidase1</i>                  | -3.56               |
| GRMZM2G020187    | <i>rgd1</i>   | <i>ragged seedling1</i>                   | 1.87                |
| GRMZM2G032003    | <i>ugp1</i>   | <i>UDP-glucose pyrophosphorylase1</i>     | -1.27               |
| GRMZM2G032628    | <i>ae1</i>    | <i>amylose extender1</i>                  | 5.22                |
| GRMZM2G034647    | <i>cyc1</i>   | <i>cyclin1</i>                            | 7.49                |
| GRMZM2G036464    | <i>gln5</i>   | <i>glutamine synthetase5</i>              | -1.21               |
| GRMZM2G050514    | <i>gln6</i>   | <i>glutamine synthetase6</i>              | -3.33               |
| GRMZM2G051943    | <i>cta1</i>   | <i>chitinase A1</i>                       | -4.66               |
| GRMZM2G056014    | <i>cap1</i>   | <i>calcium pump1</i>                      | -1.26               |
| GRMZM2G057823    | <i>ald1</i>   | <i>aldolase1</i>                          | -1.53               |
| GRMZM2G059037    | <i>afd1</i>   | <i>absence of first division1</i>         | -1.85               |
| GRMZM2G066191    | <i>tub4</i>   | <i>beta tubulin4</i>                      | -3.61               |
| GRMZM2G068506    | <i>bt2</i>    | <i>brittle endosperm2</i>                 | 1.46                |
| GRMZM2G071959    | <i>his2b1</i> | <i>histone2b1</i>                         | 1.77                |
| GRMZM2G073671    | <i>cyc3</i>   | <i>cyclin3</i>                            | 8.79                |
| GRMZM2G074361    | <i>prf1</i>   | <i>profilin homolog1</i>                  | 7.72                |
| GRMZM2G081192    | <i>pip2c</i>  | <i>plasma membrane intrinsic protein2</i> | -7.02               |
| GRMZM2G086971    | <i>ypt1</i>   | <i>ypt homolog1</i>                       | 1.13                |
| GRMZM2G087741    | <i>lg3</i>    | <i>liguleless3</i>                        | -1.53               |
| GRMZM2G088753    | <i>sbe1</i>   | <i>starch branching enzyme1</i>           | 2.52                |

| Gene ID              | Symbol               | Gene Name                                               | Log <sub>2</sub> FC |
|----------------------|----------------------|---------------------------------------------------------|---------------------|
| GRMZM2G089713        | <i>sh1</i>           | <i>shrunk1</i>                                          | 1.03                |
| GRMZM2G089836        | <i>ivr2</i>          | <i>invertase2</i>                                       | -4.31               |
| GRMZM2G092125        | <i>pip2b</i>         | <i>plasma membrane intrinsic protein2</i>               | -2.37               |
| GRMZM2G092198        | <i>emp4</i>          | <i>empty pericarp4</i>                                  | 2.25                |
| GRMZM2G096475        | <i>mlg3</i>          | <i>lea protein group3</i>                               | -6.69               |
| GRMZM2G097768        | <i>stp1</i>          | <i>sugar transport1</i>                                 | -1.13               |
| GRMZM2G098346        | <i>adh2</i>          | <i>alcohol dehydrogenase2</i>                           | -1.22               |
| GRMZM2G102499        | <i>grf1</i>          | <i>general regulatory factor1</i>                       | -1.55               |
| GRMZM2G104546        | <i>akh2</i>          | <i>aspartate kinase homoserine dehydrogenase2</i>       | 1.58                |
| <b>GRMZM2G108766</b> | <b><i>tub3</i></b>   | <b><i>beta tubulin3</i></b>                             | <b>-3.96</b>        |
| GRMZM2G113033        | <i>ssu2</i>          | <i>ribulose bisphosphate carboxylase small subunit2</i> | -3.82               |
| GRMZM2G113137        | <i>cesa6</i>         | <i>cellulose synthase6</i>                              | -1.66               |
| GRMZM2G114642        | <i>gl1</i>           | <i>glossy1</i>                                          | -3.56               |
| GRMZM2G116273        | <i>gst1</i>          | <i>glutathione-S-transferase1</i>                       | -1.20               |
| <b>GRMZM2G119071</b> | <b><i>his2b2</i></b> | <b><i>histone2b2</i></b>                                | <b>2.76</b>         |
| <b>GRMZM2G126010</b> | <b><i>act1</i></b>   | <b><i>actin1</i></b>                                    | <b>3.71</b>         |
| GRMZM2G134797        | <i>ndk1</i>          | <i>nucleotide diphosphate kinase1</i>                   | -1.99               |
| GRMZM2G136067        | <i>hda108</i>        | <i>histone deacetylase</i>                              | 1.16                |
| GRMZM2G139300        | <i>incw1</i>         | <i>cell wall invertase1</i>                             | -1.78               |
| GRMZM2G147266        | <i>fer2</i>          | <i>ferritin homolog2</i>                                | -3.48               |
| GRMZM2G154628        | <i>pip2d</i>         | <i>plasma membrane intrinsic protein2</i>               | -5.66               |
| GRMZM2G156861        | <i>lox1</i>          | <i>lipoxygenase1</i>                                    | -4.82               |
| GRMZM2G158809        | <i>zcn18</i>         | <i>phosphatidylethanolamine-binding protein18</i>       | 2.28                |
| <b>GRMZM2G164696</b> | <b><i>tub1</i></b>   | <b><i>beta tubulin1</i></b>                             | <b>2.21</b>         |
| GRMZM2G168651        | <i>hrg1</i>          | <i>hydroxyproline rich glycoprotein1</i>                | 2.08                |
| GRMZM2G172322        | <i>gsr1</i>          | <i>glutathione reductase1</i>                           | -1.99               |
| GRMZM2G178693        | <i>pip2a</i>         | <i>plasma membrane intrinsic protein2</i>               | -2.97               |

---

| <b>Gene ID</b> | <b>Symbol</b> | <b>Gene Name</b>                          | <b>Log<sub>2</sub> FC</b> |
|----------------|---------------|-------------------------------------------|---------------------------|
| GRMZM2G305046  | <i>his2a1</i> | <i>histone2A1</i>                         | 1.83                      |
| GRMZM2G307906  | <i>ms45</i>   | <i>male sterile45</i>                     | 1.60                      |
| GRMZM2G316113  | <i>rbap1</i>  | <i>WD-repeat protein RBAP1</i>            | 1.11                      |
| GRMZM2G333916  | <i>dmt101</i> | <i>DNA methyl transferase1</i>            | 1.82                      |
| GRMZM2G392975  | <i>pip1c</i>  | <i>plasma membrane intrinsic protein1</i> | -1.85                     |
| GRMZM2G452178  | <i>gn1</i>    | <i>gnarley1</i>                           | -2.14                     |
| GRMZM5G846811  | <i>rop2</i>   | <i>Rho-related protein from plants2</i>   | -1.71                     |

---

**Supplemental Table S4.** List of 132 transcription factor genes among 2,740 brace root specific nitrate responding genes.

| Gene ID          | Family | Log <sub>2</sub> Fc |
|------------------|--------|---------------------|
| GRMZM2G139082    | AP2    | 4.71                |
| GRMZM2G416701    | AP2    | -2.07               |
| GRMZM2G017187    | ARF    | -1.38               |
| GRMZM2G030710    | ARF    | 1.64                |
| GRMZM2G034840    | ARF    | 5.44                |
| GRMZM2G137413    | ARF    | 1.28                |
| GRMZM2G702026    | ARF    | 1.48                |
| GRMZM2G065478    | B3     | 4.12                |
| GRMZM2G065496    | B3     | 6.26                |
| GRMZM2G109480    | B3     | 5.29                |
| GRMZM2G111123    | B3     | 3.53                |
| GRMZM2G173321    | B3     | 2.13                |
| GRMZM2G313737    | B3     | 1.44                |
| GRMZM2G019806    | bHLH   | -4.75               |
| GRMZM2G042893    | bHLH   | -6.36               |
| GRMZM2G057260    | bHLH   | -4.45               |
| GRMZM2G088443    | bHLH   | 2.12                |
| GRMZM2G101350    | bHLH   | -4.18               |
| GRMZM2G137426    | bHLH   | -2.73               |
| GRMZM2G148723    | bHLH   | 1.26                |
| GRMZM2G159456    | bHLH   | 7.42                |
| GRMZM2G171818    | bHLH   | -1.63               |
| GRMZM2G180452    | bHLH   | -2.84               |
| GRMZM2G417597    | bHLH   | 3.16                |
| AC203957.3_FG004 | bZIP   | -2.37               |
| GRMZM2G019106    | bZIP   | -1.87               |
| GRMZM2G030877    | bZIP   | -3.06               |

| Gene ID          | Family  | Log <sub>2</sub> Fc |
|------------------|---------|---------------------|
| GRMZM2G045236    | bZIP    | 1.73                |
| GRMZM2G079365    | bZIP    | -2.34               |
| GRMZM2G134863    | bZIP    | -4.57               |
| GRMZM2G448607    | bZIP    | -2.26               |
| AC233952.1_FG008 | C2H2    | -4.98               |
| GRMZM2G081782    | C2H2    | 1.21                |
| GRMZM2G159032    | C2H2    | 1.17                |
| GRMZM2G320287    | C2H2    | 5.70                |
| GRMZM2G400714    | C2H2    | -3.60               |
| GRMZM5G887286    | C2H2    | 2.35                |
| GRMZM5G898314    | C2H2    | 1.14                |
| GRMZM2G068476    | C3H     | 1.20                |
| GRMZM2G151689    | C3H     | 1.08                |
| GRMZM2G171600    | CAMTA   | -1.43               |
| GRMZM2G060170    | CPP     | 1.38                |
| GRMZM2G153754    | CPP     | 6.58                |
| GRMZM2G322090    | CPP     | 2.09                |
| GRMZM2G098442    | DBB     | -2.50               |
| GRMZM2G179069    | Dof     | -3.27               |
| GRMZM2G148506    | E2F/DP  | 3.38                |
| GRMZM2G361659    | E2F/DP  | 6.30                |
| GRMZM2G378665    | E2F/DP  | 4.73                |
| GRMZM2G171179    | ERF     | -1.50               |
| AC234155.1_FG002 | G2-like | -1.62               |
| GRMZM2G009060    | G2-like | -1.60               |
| GRMZM2G060485    | G2-like | -1.59               |
| GRMZM2G104390    | GATA    | -3.12               |
| GRMZM2G396451    | GATA    | 1.02                |
| GRMZM2G036966    | GeBP    | 3.17                |



---

| <b>Gene ID</b>   | <b>Family</b> | <b>Log<sub>2</sub> Fc</b> |
|------------------|---------------|---------------------------|
| AC234164.1_FG004 | GRAS          | 4.14                      |
| GRMZM2G023872    | GRAS          | -3.82                     |
| GRMZM2G073823    | GRAS          | -4.05                     |
| GRMZM2G179325    | GRAS          | -2.01                     |
| GRMZM2G151266    | HB-other      | 2.27                      |
| GRMZM2G154641    | HB-other      | -2.13                     |
| AC235534.1_FG007 | HD-ZIP        | 7.78                      |
| GRMZM2G034113    | HD-ZIP        | -6.15                     |
| GRMZM2G041462    | HD-ZIP        | -4.13                     |
| GRMZM2G092517    | LBD           | -2.77                     |
| GRMZM2G055135    | LSD           | -1.43                     |
| GRMZM2G001139    | MIKC          | 4.81                      |
| GRMZM2G003514    | MIKC          | 7.18                      |
| GRMZM2G005155    | MIKC          | -2.98                     |
| GRMZM2G070034    | MIKC          | 1.23                      |
| GRMZM2G105387    | MIKC          | 1.60                      |
| GRMZM2G147716    | MIKC          | -1.12                     |
| GRMZM2G099577    | M-type        | 2.61                      |
| GRMZM2G000818    | MYB           | -1.85                     |
| GRMZM2G003406    | MYB           | -2.82                     |
| GRMZM2G017520    | MYB           | -3.06                     |
| GRMZM2G052606    | MYB           | -6.38                     |
| GRMZM2G069325    | MYB           | -2.90                     |
| GRMZM2G089686    | MYB           | -3.92                     |
| GRMZM2G119693    | MYB           | -3.92                     |
| GRMZM2G127490    | MYB           | -3.53                     |
| GRMZM2G171781    | MYB           | -2.02                     |
| GRMZM2G096759    | MYB_related   | 1.12                      |
| GRMZM2G468479    | MYB_related   | 1.91                      |

---

---

| Gene ID          | Family      | Log <sub>2</sub> Fc |
|------------------|-------------|---------------------|
| GRMZM2G531738    | MYB_related | 1.11                |
| AC212859.3_FG008 | NAC         | -3.64               |
| AC233865.1_FG003 | NAC         | -4.90               |
| GRMZM2G027309    | NAC         | 2.16                |
| GRMZM2G031001    | NAC         | 3.24                |
| GRMZM2G048826    | NAC         | -3.77               |
| GRMZM2G052239    | NAC         | -4.46               |
| GRMZM2G063522    | NAC         | -5.20               |
| GRMZM2G100583    | NAC         | -3.19               |
| GRMZM2G100593    | NAC         | 9.64                |
| GRMZM2G104078    | NAC         | 7.57                |
| GRMZM2G111770    | NAC         | 5.00                |
| GRMZM2G112548    | NAC         | 4.49                |
| GRMZM2G155816    | NAC         | 4.76                |
| GRMZM2G174070    | NAC         | -1.80               |
| GRMZM2G178998    | NAC         | -3.01               |
| GRMZM2G181605    | NAC         | -3.01               |
| GRMZM2G379608    | NAC         | 2.64                |
| GRMZM2G450445    | NAC         | 4.38                |
| GRMZM5G894234    | NAC         | 1.58                |
| GRMZM2G038303    | NF-YA       | 4.48                |
| GRMZM5G853836    | NF-YA       | -2.05               |
| GRMZM2G083964    | NF-YC       | 1.91                |
| GRMZM2G161680    | NF-YC       | 1.71                |
| GRMZM2G414805    | SBP         | 1.13                |
| GRMZM2G097683    | SRS         | 6.10                |
| GRMZM2G108798    | SRS         | 3.86                |
| GRMZM2G135783    | SRS         | 4.40                |
| GRMZM2G060507    | TALE        | -6.01               |

---

---

| <b>Gene ID</b> | <b>Family</b> | <b>Log<sub>2</sub> Fc</b> |
|----------------|---------------|---------------------------|
| GRMZM2G087741  | TALE          | -1.53                     |
| GRMZM2G099319  | TALE          | -1.67                     |
| GRMZM2G125976  | TALE          | 2.83                      |
| GRMZM2G148098  | TALE          | -2.06                     |
| GRMZM2G159431  | TALE          | -5.90                     |
| GRMZM2G452178  | TALE          | -2.14                     |
| GRMZM2G077755  | TCP           | -4.78                     |
| GRMZM2G037823  | Trihelix      | 1.98                      |
| GRMZM2G047370  | Trihelix      | 1.36                      |
| GRMZM2G169580  | Trihelix      | -3.41                     |
| GRMZM2G314660  | Trihelix      | -4.50                     |
| GRMZM2G469873  | Trihelix      | 1.60                      |
| GRMZM2G012262  | Whirly        | 1.47                      |
| GRMZM2G052671  | WRKY          | -1.59                     |
| GRMZM2G065290  | WRKY          | -3.63                     |
| GRMZM2G151407  | WRKY          | 1.15                      |
| GRMZM2G169564  | WRKY          | -4.19                     |
| GRMZM2G449681  | WRKY          | -3.29                     |

---

**Supplemental Table S5.** List of genes associated with DNA synthesis/chromatin structure. Histones extracted from bin28 of the MapMan analysis. “Classical” maize genes were highlighted in red.

| BinCode | BinName                           | Gene ID          | Description                                                                                                                        | Log <sub>2</sub> Fc |
|---------|-----------------------------------|------------------|------------------------------------------------------------------------------------------------------------------------------------|---------------------|
|         |                                   | AC203761.3_FG002 | DNA topoisomerase family protein                                                                                                   | 1.6                 |
|         |                                   | AC235534.1_FG001 | replication factor C 40 kDa                                                                                                        | 1.77                |
|         |                                   | GRMZM2G006452    | SMC2 (STRUCTURAL MAINTENANCE OF CHROMOSOMES 2)                                                                                     | 2.39                |
|         |                                   | GRMZM2G010105    | FAS1 (FASCIATA 1); histone binding                                                                                                 | 4.22                |
|         |                                   | GRMZM2G021270    | TOPII (TOPOISOMERASE II); ATP binding / DNA binding / DNA topoisomerase (ATP-hydrolyzing)/ DNA topoisomerase/ DNA-dependent ATPase | 4.56                |
|         |                                   | GRMZM2G021674    | DNA binding / catalytic/ chromatin binding / nuclease                                                                              | 1.26                |
| 28.1    | DNA.synthesis/chromatin structure | GRMZM2G030873    | ATRH1; ATP-dependent helicase/ DEAD/H-box RNA helicase binding                                                                     | 1.47                |
|         |                                   | GRMZM2G035168    | DEAD/DEAH box helicase                                                                                                             | 2.58                |
|         |                                   | GRMZM2G036619    | unknown protein                                                                                                                    | 4.99                |
|         |                                   | GRMZM2G044128    | NAP57 (Arabidopsis thaliana homologue of NAP57); pseudouridine synthase                                                            | 1.68                |
|         |                                   | GRMZM2G044550    | endonuclease/exonuclease/phosphatase family protein                                                                                | 3.23                |
|         |                                   | GRMZM2G044989    | ATP binding / DNA binding / DNA-directed DNA polymerase                                                                            | 3.84                |
|         |                                   | GRMZM2G059365    | ATP binding / ATP-dependent helicase/ helicase/ nucleic acid binding                                                               | 1.15                |
|         |                                   | GRMZM2G074818    | SYN3; protein sister chromatid cohesion 1 protein 3                                                                                | 3                   |

| BinCode | BinName                           | Gene ID       | Description                                                                                                                                                                                      | Log <sub>2</sub> Fc |
|---------|-----------------------------------|---------------|--------------------------------------------------------------------------------------------------------------------------------------------------------------------------------------------------|---------------------|
|         |                                   | GRMZM2G076484 | protein ATP-dependent RNA helicase<br>DBP3                                                                                                                                                       | 1.04                |
|         |                                   | GRMZM2G086934 | replication protein                                                                                                                                                                              | 2.78                |
|         |                                   | GRMZM2G091006 | ARP; DNA-(apurinic or apyrimidinic<br>site) lyase                                                                                                                                                | 2.37                |
|         |                                   | GRMZM2G095865 | DNA gyrase subunit A family protein                                                                                                                                                              | 1.36                |
|         |                                   | GRMZM2G096184 | EMB2656 (EMBRYO DEFECTIVE<br>2656); binding                                                                                                                                                      | 2.91                |
|         |                                   | GRMZM2G096458 | FAS1 (FASCIATA 1); histone binding                                                                                                                                                               | 3.34                |
|         |                                   | GRMZM2G096759 | DNA binding                                                                                                                                                                                      | 1.12                |
|         |                                   | GRMZM2G096920 | DNA binding / catalytic/ nuclease                                                                                                                                                                | 2.67                |
|         |                                   | GRMZM2G098714 | replication protein                                                                                                                                                                              | 3.43                |
|         |                                   | GRMZM2G101390 | unknown protein                                                                                                                                                                                  | 5.75                |
| 28.1    | DNA.synthesis/chromatin structure | GRMZM2G107987 | ATP binding / ATP-dependent DNA<br>helicase/ ATP-dependent helicase/<br>DNA binding / hydrolase, acting on<br>acid anhydrides, in phosphorus-<br>containing anhydrides / nucleic acid<br>binding | 1.72                |
|         |                                   | GRMZM2G113228 | ATNTH1 / endonuclease-related                                                                                                                                                                    | -1.69               |
|         |                                   | GRMZM2G117028 | STI (STICHEL); ATP binding / DNA<br>binding / DNA-directed DNA<br>polymerase                                                                                                                     | 2.05                |
|         |                                   | GRMZM2G117100 | TFL2 (TERMINAL FLOWER 2); DNA<br>binding / methylated histone residue<br>binding                                                                                                                 | 1                   |
|         |                                   | GRMZM2G117238 | ORC2 (ORIGIN RECOGNITION<br>COMPLEX SECOND LARGEST<br>SUBUNIT 2); DNA replication origin<br>binding / protein binding                                                                            | 2                   |
|         |                                   | GRMZM2G121210 | TOPII (TOPOISOMERASE II); ATP<br>binding / DNA binding / DNA<br>topoisomerase (ATP-hydrolyzing)/<br>DNA-dependent ATPase                                                                         | 4.95                |

| BinCode | BinName                           | Gene ID       | Description                                                                                                                      | Log <sub>2</sub> Fc |
|---------|-----------------------------------|---------------|----------------------------------------------------------------------------------------------------------------------------------|---------------------|
| 28.1    | DNA-synthesis/chromatin structure | GRMZM2G121262 | endonuclease                                                                                                                     | 1.71                |
|         |                                   | GRMZM2G121427 | ATP binding / ATP-dependent DNA helicase/ DNA binding / hydrolase                                                                | 2.11                |
|         |                                   | GRMZM2G129007 | DEAD/DEAH box helicase                                                                                                           | 1.14                |
|         |                                   | GRMZM2G132704 | nucleolar protein gar2-related                                                                                                   | -1.38               |
|         |                                   | GRMZM2G141948 | DNA-directed DNA polymerase family protein                                                                                       | 1.89                |
|         |                                   | GRMZM2G143588 | POLD2 (DNA POLYMERASE DELTA SMALL SUBUNIT); DNA binding / DNA-directed DNA polymerase                                            | 1.35                |
|         |                                   | GRMZM2G146047 | zinc finger (CCCH type) helicase family protein                                                                                  | 1.78                |
|         |                                   | GRMZM2G147390 | unknown protein                                                                                                                  | -2.77               |
|         |                                   | GRMZM2G151944 | DNA-directed DNA polymerase family protein                                                                                       | 3.81                |
|         |                                   | GRMZM2G154267 | ATDPB2 (ARABIDOPSIS THALIANA DNA POLYMERASE EPSILON SUBUNIT B2); DNA binding / DNA-directed DNA polymerase/ nucleic acid binding | 2.25                |
|         |                                   | GRMZM2G157267 | inositol-1,4,5-trisphosphate 5-phosphatase CVP2                                                                                  | -1.58               |
|         |                                   | GRMZM2G159008 | inositol polyphosphate 5-phosphatase                                                                                             | -9.23               |
|         |                                   | GRMZM2G162445 | MCM3 / DNA replication licensing factor                                                                                          | 2.42                |
|         |                                   | GRMZM2G167338 | ATTERT (TELOMERASE REVERSE TRANSCRIPTASE); telomerase/ telomeric template RNA reverse transcriptase                              | 6.6                 |
|         |                                   | GRMZM2G168249 | ORC1A (ORIGIN RECOGNITION COMPLEX 1); DNA binding / double-stranded methylated DNA binding                                       | 1.58                |
|         |                                   | GRMZM2G169648 | AtPOT1b (protection of telomeres 1b); DNA binding                                                                                | 1.45                |

| BinCode | BinName                           | Gene ID       | Description                                                              | Log <sub>2</sub> Fc |
|---------|-----------------------------------|---------------|--------------------------------------------------------------------------|---------------------|
| 28.1    | DNA.synthesis/chromatin structure | GRMZM2G170291 | endonuclease/exonuclease/phosphatase family protein                      | 1.85                |
|         |                                   | GRMZM2G172787 | DNA topoisomerase family protein                                         | 2.03                |
|         |                                   | GRMZM2G172956 | NAP57 (Arabidopsis thaliana homologue of NAP57); pseudouridine synthase  | 2.02                |
|         |                                   | GRMZM2G303752 | DEAD/DEAH box helicase                                                   | 1.47                |
|         |                                   | GRMZM2G313020 | tRNA-splicing endonuclease positive effector                             | 3.04                |
|         |                                   | GRMZM2G317051 | FAS1 (FASCIATA 1); histone binding                                       | 2.5                 |
|         |                                   | GRMZM2G322506 | tRNA-splicing endonuclease positive effector-related                     | 1.15                |
|         |                                   | GRMZM2G326328 | protein condensin complex subunit 1                                      | 2.75                |
|         |                                   | GRMZM2G328268 | unknown protein                                                          | 2.4                 |
|         |                                   | GRMZM2G342895 | unknown protein                                                          | 9.3                 |
|         |                                   | GRMZM2G346278 | RCK (ROCK-N-ROLLERS); ATP binding / ATP-dependent helicase/ DNA helicase | 2.95                |
|         |                                   | GRMZM2G352898 | endonuclease/exonuclease/phosphatase family protein                      | 5.51                |
|         |                                   | GRMZM2G355771 | kinase interacting family protein                                        | -1.21               |
|         |                                   | GRMZM2G361501 | MUS81 (MMS AND UV SENSITIVE 81); endonuclease/ nucleic acid binding      | 6.35                |
|         |                                   | GRMZM2G398668 | endonuclease                                                             | 1.6                 |
|         |                                   | GRMZM2G420865 | DEAD/DEAH box helicase                                                   | 1.16                |
|         |                                   | GRMZM2G421655 | ATP binding / ATP-dependent DNA helicase/ DNA binding / hydrolase        | 2.01                |
|         |                                   | GRMZM2G425986 | adenine-DNA glycosylase-related / MYH-related                            | 1.81                |
|         |                                   | GRMZM5G804064 | DEAD/DEAH box helicase                                                   | 1.56                |

| BinCode       | BinName                                   | Gene ID              | Description                                                                                                      | Log <sub>2</sub> Fc |
|---------------|-------------------------------------------|----------------------|------------------------------------------------------------------------------------------------------------------|---------------------|
| 28.1          | DNA-synthesis/chromatin structure         | GRMZM2G455243        | ORC1B (ORIGIN OF REPLICATION COMPLEX 1B); DNA binding / double-stranded methylated DNA binding / protein binding | 1.44                |
|               |                                           | GRMZM2G480171        | POLGAMMA2 (polymerase gamma 2); DNA binding / DNA-directed DNA polymerase                                        | 1.57                |
|               |                                           | GRMZM5G825512        | ORC6 (ORIGIN RECOGNITION COMPLEX PROTEIN 6); DNA binding                                                         | 3.08                |
|               |                                           | GRMZM5G857930        | POT1a (Protection of Telomeres 1a); telomeric DNA binding                                                        | 1.18                |
|               |                                           | GRMZM5G884544        | DNA binding                                                                                                      | 2.37                |
|               |                                           | GRMZM5G897976        | DEAD/DEAH box helicase                                                                                           | 1.28                |
| 28.1.3        | DNA-synthesis/chromatin structure.histone | AC196961.2_FG003     | histone H4                                                                                                       | 2.55                |
|               |                                           | AC212565.3_FG001     | histone H4                                                                                                       | 2.2                 |
|               |                                           | AC233865.1_FG001     | histone H4                                                                                                       | 2.45                |
|               |                                           | GRMZM2G003306        | histone H2A                                                                                                      | 1.89                |
|               |                                           | GRMZM2G016232        | histone H4                                                                                                       | 2.3                 |
|               |                                           | GRMZM2G041381        | histone H2A                                                                                                      | 1.85                |
|               |                                           | GRMZM2G046841        | histone H2B                                                                                                      | 1.56                |
|               |                                           | GRMZM2G047813        | histone H2A                                                                                                      | 1.56                |
|               |                                           | GRMZM2G050833        | histone H2A                                                                                                      | 1.18                |
|               |                                           | GRMZM2G056231        | histone H2A                                                                                                      | 1.93                |
|               |                                           | GRMZM2G057852        | histone H2B                                                                                                      | 3.61                |
|               |                                           | GRMZM2G063896        | histone H4                                                                                                       | 2.96                |
|               |                                           | GRMZM2G069911        | histone H1                                                                                                       | 2.47                |
|               |                                           | <b>GRMZM2G071959</b> | <b>histone H2B</b>                                                                                               | <b>1.77</b>         |
|               |                                           | GRMZM2G072855        | histone H4                                                                                                       | 2.16                |
| GRMZM2G073275 | histone H4                                | 2.08                 |                                                                                                                  |                     |
| GRMZM2G078314 | histone H3                                | 2.42                 |                                                                                                                  |                     |



| BinCode | BinName                                   | Gene ID              | Description        | Log <sub>2</sub> Fc |
|---------|-------------------------------------------|----------------------|--------------------|---------------------|
|         |                                           | GRMZM2G079089        | histone H2B        | 1.92                |
|         |                                           | GRMZM2G080274        | histone H1         | 2.3                 |
|         |                                           | GRMZM2G084195        | histone H4         | 2.68                |
|         |                                           | GRMZM2G107540        | histone H2A        | 2.81                |
|         |                                           | GRMZM2G109448        | histone H2A        | 2.86                |
|         |                                           | GRMZM2G112912        | histone H2B        | 2.33                |
|         |                                           | <b>GRMZM2G119071</b> | <b>histone H2B</b> | <b>2.76</b>         |
|         |                                           | GRMZM2G121221        | histone H1         | 2.93                |
|         |                                           | GRMZM2G141432        | histone H2B        | 1.24                |
|         |                                           | GRMZM2G143780        | histone H4         | 2.34                |
|         |                                           | GRMZM2G149178        | histone H4         | 3.48                |
|         |                                           | GRMZM2G151826        | histone H2A        | 1.64                |
|         |                                           | GRMZM2G158526        | histone H3         | 2.9                 |
|         |                                           | GRMZM2G163939        | histone H2B        | 1.89                |
| 28.1.3  | DNA.synthesis/chromatin structure.histone | GRMZM2G179005        | histone H3         | 2.22                |
|         |                                           | GRMZM2G181153        | histone H4         | 2.55                |
|         |                                           | GRMZM2G304575        | histone H2B        | 1.35                |
|         |                                           | <b>GRMZM2G305046</b> | <b>histone H2A</b> | <b>1.83</b>         |
|         |                                           | GRMZM2G332838        | histone H4         | 1.93                |
|         |                                           | GRMZM2G342515        | histone H2B        | 2.92                |
|         |                                           | GRMZM2G349651        | histone H4         | 2.07                |
|         |                                           | GRMZM2G355773        | histone H3         | 2.43                |
|         |                                           | GRMZM2G376957        | histone H3         | 4.16                |
|         |                                           | GRMZM2G387076        | histone H3         | 1.7                 |
|         |                                           | GRMZM2G401147        | histone H2B        | 1.97                |
|         |                                           | GRMZM2G418258        | histone H3         | 3.12                |
|         |                                           | GRMZM2G421279        | histone H4         | 2.85                |
|         |                                           | GRMZM2G448458        | histone H2A        | 2.83                |
|         |                                           | GRMZM2G451254        | histone H3         | 2.71                |

| BinCode | BinName                                      | Gene ID       | Description | Log <sub>2</sub> Fc |
|---------|----------------------------------------------|---------------|-------------|---------------------|
| 28.1.3  | DNA.synthesis/chromatin<br>structure.histone | GRMZM2G472696 | histone H2B | 2.67                |
|         |                                              | GRMZM2G475899 | histone H3  | 2.96                |
|         |                                              | GRMZM2G479684 | histone H4  | 2.82                |
|         |                                              | GRMZM5G864735 | histone H3  | 3.3                 |
|         |                                              | GRMZM5G873455 | histone H1  | 2.36                |
|         |                                              | GRMZM5G883764 | histone H2A | 3.01                |

**Supplemental Table S6.** List of genes associated with cell cycle, cell division and cell organization extracted from bin31 of the MapMan analysis. “Classical” maize genes were highlighted in red.

| BinCode | BinName           | Gene ID          | Description                                                               | Log <sub>2</sub> Fc |
|---------|-------------------|------------------|---------------------------------------------------------------------------|---------------------|
|         |                   | AC195154.3_FG004 | XIE; motor/ protein binding                                               | -1.35               |
|         |                   | AC195340.3_FG001 | TUA6; structural constituent of cytoskeleton                              | 1.14                |
|         |                   | GRMZM2G001639    | PP2-A13 (Arabidopsis thaliana phloem protein 2-A13); carbohydrate binding | -2.55               |
|         |                   | GRMZM2G002825    | ADF4 (ACTIN DEPOLYMERIZING FACTOR 4); actin binding                       | -1.15               |
|         |                   | GRMZM2G006765    | ACT7 (ACTIN 7); structural constituent of cytoskeleton                    | -4.05               |
|         |                   | GRMZM2G007514    | SCAR2 (SCAR HOMOLOG 2)                                                    | -3.24               |
|         |                   | GRMZM2G015127    | ADF7 (actin depolymerizing factor 7); actin binding                       | 4.33                |
| 31.1    | cell.organisation | GRMZM2G016668    | ankyrin repeat family protein                                             | -3.52               |
|         |                   | GRMZM2G018951    | ATP binding / microtubule motor                                           | -2.74               |
|         |                   | GRMZM2G023279    | myosin heavy chain-related                                                | -2.35               |
|         |                   | GRMZM2G026560    | chromosome-associated kinesin                                             | 5.06                |
|         |                   | GRMZM2G029223    | kinesin motor protein-related                                             | 2.31                |
|         |                   | GRMZM2G030169    | ACT7 (ACTIN 7); structural constituent of cytoskeleton                    | -3.47               |
|         |                   | GRMZM2G030284    | MAP65-3   PLE (PLEIADE); microtubule binding                              | 8.98                |
|         |                   | GRMZM2G033785    | ZCF125; ATP binding / microtubule motor                                   | 4.69                |
|         |                   | GRMZM2G034828    | kinesin motor family protein                                              | 4.64                |
|         |                   | GRMZM2G037472    | kinesin motor protein-related                                             | -3.04               |
|         |                   | GRMZM2G039855    | chromosome-associated kinesin                                             | 3.42                |

| BinCode | BinName           | Gene ID       | Description                                                              | Log <sub>2</sub> Fc |
|---------|-------------------|---------------|--------------------------------------------------------------------------|---------------------|
|         |                   | GRMZM2G043346 | plectin-related                                                          | -1.29               |
|         |                   | GRMZM2G045808 | ATEB1C (microtubule end binding protein 1); microtubule binding          | 5.56                |
|         |                   | GRMZM2G051782 | TUA5; structural constituent of cytoskeleton                             | 3.19                |
|         |                   | GRMZM2G056826 | protein cadmium tolerance factor                                         | -4.26               |
|         |                   | GRMZM2G060702 | ADF11 (ACTIN DEPOLYMERIZING FACTOR 11); actin binding                    | -1.35               |
|         |                   | GRMZM2G062084 | phragmoplast-associated kinesin-related protein 2 (PAKRP2)               | 6.13                |
|         |                   | GRMZM2G064875 | ADF6 (ACTIN DEPOLYMERIZING FACTOR 6); actin binding                      | 3.38                |
| 31.1    | cell.organisation | GRMZM2G066191 | TUB8; structural constituent of cytoskeleton                             | -3.61               |
|         |                   | GRMZM2G069687 | SCAR2 (SCAR HOMOLOG 2)                                                   | -1.57               |
|         |                   | GRMZM2G074361 | PRF4 (PROFILIN 4); actin binding                                         | 7.72                |
|         |                   | GRMZM2G077842 | POK2 (PHRAGMOPLAST ORIENTING KINESIN 2); ATP binding / microtubule motor | 4.36                |
|         |                   | GRMZM2G081322 | VLN3 (VILLIN 3); actin binding                                           | 1.56                |
|         |                   | GRMZM2G082384 | kinesin motor protein-related                                            | 4.15                |
|         |                   | GRMZM2G083475 | kinesin motor protein-related                                            | 4.51                |
|         |                   | GRMZM2G088482 | AtPP2-A11 (Phloem protein 2-A11); carbohydrate binding                   | -2.71               |
|         |                   | GRMZM2G092232 | kinesin motor protein-related                                            | 4                   |
|         |                   | GRMZM2G099944 | TUB8; structural constituent of cytoskeleton                             | -2.4                |
|         |                   | GRMZM2G100714 | MAP65-6; microtubule binding                                             | -2.46               |

| BinCode | BinName           | Gene ID       | Description                                                                                                   | Log <sub>2</sub> Fc |
|---------|-------------------|---------------|---------------------------------------------------------------------------------------------------------------|---------------------|
|         |                   | GRMZM2G106028 | MAP65-3; microtubule binding                                                                                  | 1.97                |
|         |                   | GRMZM2G108766 | TUB8; structural constituent of cytoskeleton                                                                  | -3.96               |
|         |                   | GRMZM2G108780 | PRF4 (PROFILIN 4); actin binding                                                                              | -1.07               |
|         |                   | GRMZM2G109842 | PRF4 (PROFILIN 4); actin binding                                                                              | 3.17                |
|         |                   | GRMZM2G112337 | chloroplast nucleoid DNA-binding protein; MAP65-1 (MICROTUBULE-ASSOCIATED PROTEINS 65-1); microtubule binding | 2.12                |
|         |                   | GRMZM2G113652 | ATP binding / microtubule motor                                                                               | 4.46                |
|         |                   | GRMZM2G114841 | MAP65-8 (MICROTUBULE-ASSOCIATED PROTEIN 65-8)                                                                 | -3.22               |
| 31.1    | cell.organisation | GRMZM2G120244 | ATP binding / microtubule motor                                                                               | 5.1                 |
|         |                   | GRMZM2G126010 | ACT7 (ACTIN 7); structural constituent of cytoskeleton                                                        | 3.71                |
|         |                   | GRMZM2G126190 | ACT7 (ACTIN 7); structural constituent of cytoskeleton                                                        | -1.33               |
|         |                   | GRMZM2G127115 | VLN1 (VILLIN-LIKE 1); actin binding / actin filament binding                                                  | 1.14                |
|         |                   | GRMZM2G128426 | myosin heavy chain-related                                                                                    | 2.44                |
|         |                   | GRMZM2G132371 | kinesin motor protein-related                                                                                 | 4.09                |
|         |                   | GRMZM2G136219 | kinesin motor protein-related                                                                                 | 5.34                |
|         |                   | GRMZM2G136838 | NACK1   HIK (HINKEL); ATP binding / microtubule motor                                                         | 7.93                |
|         |                   | GRMZM2G141208 | MAP65-1 (MICROTUBULE-ASSOCIATED PROTEINS 65-1); microtubule binding                                           | 3.59                |
|         |                   | GRMZM2G142019 | myosin heavy chain-related                                                                                    | 2.09                |
|         |                   | GRMZM2G144415 | kinesin-like protein                                                                                          | 4.67                |

| BinCode | BinName           | Gene ID       | Description                                                | Log <sub>2</sub> Fc |
|---------|-------------------|---------------|------------------------------------------------------------|---------------------|
|         |                   | GRMZM2G150984 | phragmoplast-associated kinesin-related protein 2 (PAKRP2) | 4.59                |
|         |                   | GRMZM2G152328 | ACT11 (actin-11); structural constituent of cytoskeleton   | -1.79               |
|         |                   | GRMZM2G157616 | ATP binding / microtubule motor                            | 8.24                |
|         |                   | GRMZM2G164696 | TUB8; structural constituent of cytoskeleton               | 2.21                |
|         |                   | GRMZM2G173700 | kinesin motor protein-related                              | 1.1                 |
|         |                   | GRMZM2G176047 | kinesin motor protein-related                              | 5.54                |
|         |                   | GRMZM2G177867 | kinesin motor protein-related                              | 4.05                |
|         |                   | GRMZM2G178650 | pectin-related                                             | -2.32               |
|         |                   | GRMZM2G301194 | kinesin motor protein-related                              | 5.29                |
| 31.1    | cell.organisation | GRMZM2G308203 | ankyrin repeat family protein                              | -2.93               |
|         |                   | GRMZM2G315594 | ATP binding / microtubule motor                            | 4.46                |
|         |                   | GRMZM2G320689 | kinesin motor protein-related                              | 3.48                |
|         |                   | GRMZM2G324467 | myosin-related                                             | 4.52                |
|         |                   | GRMZM2G359566 | VLN3 (VILLIN 3); actin binding                             | 2.99                |
|         |                   | GRMZM2G363813 | catalytic                                                  | 3.39                |
|         |                   | GRMZM2G375593 | VLN4 (VILLIN 4); actin binding                             | -1.38               |
|         |                   | GRMZM2G400223 | kinesin motor protein-related                              | 8.04                |
|         |                   | GRMZM2G409343 | XIC; motor/ protein binding                                | -2.37               |
|         |                   | GRMZM2G423861 | ZWI (ZWICHEL); calmodulin binding / microtubule motor      | -1.05               |
|         |                   | GRMZM2G436981 | ATK1 (ARABIDOPSIS THALIANA KINESIN 1); microtubule motor   | 3.15                |
|         |                   | GRMZM2G443903 | alpha-N-acetylglucosaminidase family / NAGLU family        | -1.33               |
|         |                   | GRMZM2G449909 | XI-I; motor/ protein binding                               | 2.21                |

| BinCode | BinName           | Gene ID          | Description                                                                               | Log <sub>2</sub> Fc |
|---------|-------------------|------------------|-------------------------------------------------------------------------------------------|---------------------|
|         |                   | GRMZM2G451231    | ATP binding / microtubule motor                                                           | 4.14                |
|         |                   | GRMZM2G471186    | KINESIN-12B; microtubule motor/<br>plus-end-directed microtubule<br>motor                 | 7.28                |
|         |                   | GRMZM2G471904    | PPL2 (PsbP-like protein 2);<br>calcium ion binding                                        | 2.3                 |
|         |                   | GRMZM5G817395    | kinesin-4; ATP binding /<br>microtubule motor                                             | 6.96                |
|         |                   | GRMZM5G820912    | kinesin-4                                                                                 | 7.35                |
|         |                   | GRMZM5G824964    | EB1C (microtubule end binding<br>protein 1); microtubule binding                          | 2.44                |
| 31.1    | cell.organisation | GRMZM5G832989    | MAP70-2 (microtubule-<br>associated proteins 70-2);<br>microtubule binding                | 2.93                |
|         |                   | GRMZM5G836827    | VLN4 (ARABIDOPSIS<br>THALIANA VILLIN 4); actin<br>binding                                 | -1.22               |
|         |                   | GRMZM5G853513    | TUB8; structural constituent of<br>cytoskeleton                                           | -1.15               |
|         |                   | GRMZM5G856071    | TUB7; structural constituent of<br>cytoskeleton                                           | 2.05                |
|         |                   | GRMZM5G877336    | POK2 (PHRAGMOPLAST<br>ORIENTING KINESIN 2); ATP<br>binding / microtubule motor            | 2.69                |
|         |                   | GRMZM5G877388    | PRF5 (PROFILIN5); actin binding<br>/ actin monomer binding                                | -1.44               |
|         |                   | GRMZM5G887077    | ATP binding / microtubule motor                                                           | 7.98                |
|         |                   | AC197146.3_FG001 | CDC45 (cell division cycle protein<br>45)                                                 | 2.3                 |
| 31.2    | cell.division     | GRMZM2G003565    | UVR8 (UVB-RESISTANCE 8);<br>chromatin binding / guanyl-<br>nucleotide exchange factor     | -1.13               |
|         |                   | GRMZM2G018689    | ribosome recycling factor family<br>protein / ribosome releasing<br>factor family protein | 1.64                |

| BinCode | BinName       | Gene ID       | Description                                                                          | Log <sub>2</sub> Fc |
|---------|---------------|---------------|--------------------------------------------------------------------------------------|---------------------|
|         |               | GRMZM2G029536 | transducin family protein / WD-40 repeat family protein                              | 4.47                |
|         |               | GRMZM2G033828 | RBR1 (RETINOBLASTOMA-RELATED 1); transcription factor binding                        | 2.53                |
|         |               | GRMZM2G047143 | mitotic spindle checkpoint protein, putative (MAD2)                                  | 4.41                |
|         |               | GRMZM2G059037 | SYN1 (SYNAPTIC 1); protein sister chromatid cohesion 1 protein 1                     | -1.85               |
|         |               | GRMZM2G068193 | CDKB2;1 (cyclin-dependent kinase B2;1); cyclin-dependent protein kinase              | 4.55                |
|         |               | GRMZM2G070115 | CDKB2;2 (cyclin-dependent kinase B2;2); cyclin-dependent protein kinase              | 7.43                |
|         |               | GRMZM2G112072 | mitotic spindle checkpoint protein, putative (MAD2)                                  | 8.09                |
| 31.2    | cell.division | GRMZM2G121724 | FTSZ2-1; protein binding / structural molecule                                       | 3.59                |
|         |               | GRMZM2G129444 | mitotic checkpoint family protein                                                    | 1.12                |
|         |               | GRMZM2G131324 | ATP-binding family protein                                                           | 1.1                 |
|         |               | GRMZM2G143590 | ZYP1b                                                                                | 2.42                |
|         |               | GRMZM2G145879 | CDKD1;1 (cyclin-dependent kinase D1;2); cyclin-dependent protein kinase              | 4.89                |
|         |               | GRMZM2G147603 | APC6 / cell division cycle family protein                                            | 1.34                |
|         |               | GRMZM2G162546 | CDKB2;2 (cyclin-dependent kinase B2;2); cyclin-dependent protein kinase              | 6.09                |
|         |               | GRMZM2G166684 | APC6 / cell division cycle family protein                                            | 1.98                |
|         |               | GRMZM2G170591 | CDC23 (cell division cycle protein 23) / APC8 (ANAPHASE-PROMOTING COMPLEX SUBUNIT 8) | 1.27                |
|         |               | GRMZM2G177070 | cell division protein ftsH                                                           | 2.61                |



| BinCode       | BinName                                                    | Gene ID       | Description                                                                                   | Log <sub>2</sub> Fc |
|---------------|------------------------------------------------------------|---------------|-----------------------------------------------------------------------------------------------|---------------------|
| 31.2          | cell.division                                              | GRMZM2G315264 | CIP111 (CAM INTERACTING PROTEIN 111); ATPase / calmodulin binding                             | 1.73                |
|               |                                                            | GRMZM2G383623 | SMC3 (ARABIDOPSIS THALIANA STRUCTURAL MAINTENANCE OF CHROMOSOME 3); ATP binding / transporter | 1.87                |
|               |                                                            | GRMZM2G392710 | HBT, CDC27b (cell division cycle protein 23) / HBT (HOBBIT); binding                          | 1.41                |
|               |                                                            | GRMZM2G440916 | structural maintenance of chromosomes (SMC) family protein (MSS2)                             | 1.43                |
|               |                                                            | GRMZM2G451716 | AML4 (ARABIDOPSIS MEI2-LIKE 4); RNA binding / nucleic acid binding / nucleotide binding       | 2.72                |
|               |                                                            | GRMZM2G467695 | cell division cycle protein 16                                                                | 6.07                |
|               |                                                            | GRMZM2G495626 | CDKB1;1 (cyclin-dependent kinase B1;1); cyclin-dependent protein kinase                       | 1.69                |
|               |                                                            | GRMZM2G703490 | cell division cycle protein 48, putative / CDC48                                              | 1.24                |
|               |                                                            | GRMZM5G814700 | AML1 (ARABIDOPSIS MEI2-LIKE PROTEIN 1); RNA binding / protein binding                         | -1.1                |
| GRMZM5G866734 | regulator of chromosome condensation (RCC1) family protein | 2.85          |                                                                                               |                     |
| 31.3          | cell.cycle                                                 | GRMZM2G005619 | CYCB1;2 / CYC1BAT; cyclin-dependent protein kinase regulator                                  | 6.04                |
|               |                                                            | GRMZM2G017081 | CYCB3B / cyclin-dependent protein kinase regulator                                            | 2.82                |
|               |                                                            | GRMZM2G026346 | CYCA3;4 / cyclin-dependent protein kinase regulator                                           | 3.69                |
|               |                                                            | GRMZM2G034647 | CYCB1;4 / cyclin-dependent protein kinase regulator                                           | 7.49                |
|               |                                                            | GRMZM2G061287 | CYCB2;4 / cyclin-dependent protein kinase regulator                                           | 9.27                |
|               |                                                            | GRMZM2G064005 | FZR2 (FIZZY-RELATED 2); signal transducer                                                     | -1.93               |

| BinCode | BinName    | Gene ID       | Description                                         | Log <sub>2</sub> Fc |
|---------|------------|---------------|-----------------------------------------------------|---------------------|
|         |            | GRMZM2G073003 | CYCB1;2 / cyclin-dependent protein kinase regulator | 8.46                |
|         |            | GRMZM2G073671 | CYCB2;3 / cyclin-dependent protein kinase regulator | 8.79                |
|         |            | GRMZM2G115670 | CYCT1;4; cyclin-dependent protein kinase            | 1.24                |
|         |            | GRMZM2G138886 | CYCB2;4 / cyclin-dependent protein kinase regulator | 5.62                |
| 31.3    | cell.cycle | GRMZM2G160563 | CYCP4;3; cyclin-dependent protein kinase regulator  | -2.47               |
|         |            | GRMZM2G178215 | CYCA3;1 / cyclin-dependent protein kinase regulator | 3.72                |
|         |            | GRMZM2G303157 | Unknown function                                    | 2.35                |
|         |            | GRMZM2G363437 | CYCA3;4 / cyclin-dependent protein kinase regulator | 5.6                 |
|         |            | GRMZM5G813206 | binding                                             | -1.64               |
|         |            | GRMZM5G879536 | CYCA2;1 / cyclin-dependent protein kinase regulator | 2.15                |
